# Supplementary material for: Evaluation of a low-cost optical particle counter (Alphasense OPC-N2) for ambient air monitoring
Source: Copernicus journal article supplement (doi:10.5194/amt-11-709-2018), 2018-02-07
Supplement: Supplementary file 1 [file amt-11-709-2018-supplement.zip]

Archive with 3 entries (3 files):
- amt-11-709-2018-supplement-title-page.pdf
- Supplement.pdf
- alphasense_OPCN2_RPI3_logger.py2.txt
