# Supplementary material for: Evaluation of a low-cost optical particle counter (Alphasense OPC-N2) for ambient air monitoring
Source: Copernicus journal article supplement (doi:10.5194/amt-11-709-2018), 2018-02-07
Supplement: Supplementary file 1 [file amt-11-709-2018-supplement.zip › alphasense_OPCN2_RPI3_logger.py2.txt]

#################################################################################
# Python script for data logging output from a Alphasense OPC-N2 onto a Raspberry Pi 3  
# Script written by Dr Robin Price (www.robinprice.net) and Dr Francis Pope (University of Birmingham)
# uses py-opc python library for operating the Alphasense OPC-N2 written by David H. Hagan (MIT), full documentation available at https://github.com/dhhagan/py-opc
# set to datalog with a 10 s time period with maximum duration of 1 year
##################################################################################

#!/usr/bin/env python
import spidev
import opc
from time import sleep
from datetime import datetime
spi = spidev.SpiDev()
spi.open(0, 0)
spi.mode = 1
spi.max_speed_hz = 500000
try:
    alpha = opc.OPCN2(spi)
except Exception as e:
    print ("Startup Error: {}".format(e))

#
alpha.off()
sleep(2)

alpha.on()

sleep(2)

print(alpha.config2())
for i in range(60*60*24*365):
    robin = alpha.histogram()
    print(robin)
    francis =  open('filename', 'a')
    francis.write(str(datetime.utcnow()) + ", ")
    francis.write(str(robin['PM1']) + ", ")
    francis.write(str(robin['PM2.5']) + ", ")
    francis.write(str(robin['PM10']) + ", ")
    francis.write(str(robin['Bin 0']) + ", ")
    francis.write(str(robin['Bin 1']) + ", ")
    francis.write(str(robin['Bin 2']) + ", ")
    francis.write(str(robin ['Bin 3']) + ", ")
    francis.write(str(robin['Bin 4']) + ", ")
    francis.write(str(robin['Bin 5']) + ", ")
    francis.write(str(robin['Bin 6']) + ", ")
    francis.write(str(robin['Bin 7']) + ", ")
    francis.write(str(robin['Bin 8']) + ", ")
    francis.write(str(robin['Bin 9']) + ", ")
    francis.write(str(robin['Bin 10']) + ", ")
    francis.write(str(robin['Bin 11']) + ", ")
    francis.write(str(robin['Bin 12']) + ", ")
    francis.write(str(robin['Bin 13']) + ", ")
    francis.write(str(robin['Bin 14']) + ", ")
    francis.write(str(robin['Bin 15']) + ", ")
    francis.write(str(robin['Sampling Period']) + "\n")
    francis.close()
    sleep(10)

alpha.off()
