# Supplementary material for: Evaluation of a low-cost optical particle counter (Alphasense OPC-N2) for ambient air monitoring
Source: Copernicus journal article supplement (doi:10.5194/amt-11-709-2018), 2018-02-07
Supplement: Supplementary file 1 [file amt-11-709-2018-supplement.zip › amt-11-709-2018-supplement-title-page.pdf]

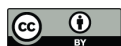

*Supplement of*

## **Evaluation of a low-cost optical particle counter (Alphasense OPC-N2) for ambient air monitoring**

**Leigh R. Crilley et al.**

*Correspondence to:* Francis D. Pope ([f.pope@bham.ac.uk](mailto:f.pope@bham.ac.uk))

- [amt-11-709-2018-supplement-title-page.pdf](#)
- [Supplement.pdf](#)
- [alphasense\\_OPCN2\\_RPI3\\_logger.py2.txt](#)

The copyright of individual parts of the supplement might differ from the CC BY 4.0 License.
